# Supplementary material
Source: publisher site journal article supplement (https://www.dovepress.com/article/529339)
Supplement: Supplementary file 1 [file 529339%20Revised%20Table%20S1-S3.docx]

Supplementary material

Table S1. Top 10 subject categories of Web of Science in the field of exercise for depression.

| Rank | Category | Counts | Citations | Average  per item | H-index |
| --- | --- | --- | --- | --- | --- |
| 1 | Psychiatry | 783 | 24982 | 31.91 | 74 |
| 2 | Public Environmental Occupational Health | 255 | 6132 | 24.05 | 37 |
| 3 | Neurosciences | 255 | 8898 | 34.89 | 46 |
| 4 | Clinical Neurology | 239 | 7610 | 31.84 | 43 |
| 5 | Psychology Clinical | 221 | 7136 | 32.29 | 42 |
| 6 | Medicine General Internal | 134 | 4933 | 36.81 | 34 |
| 7 | Nursing | 114 | 2041 | 17.90 | 28 |
| 8 | Psychology Multidisciplinary | 113 | 2138 | 18.92 | 25 |
| 9 | Geriatrics Gerontology | 101 | 2087 | 20.66 | 25 |
| 10 | Psychology | 100 | 3664 | 36.64 | 31 |

Table S2. Keyword clusters in the field of exercise for depression.

| Cluster ID | Cluster label | Size | Silhouette a | Mean (year) |
| --- | --- | --- | --- | --- |
| # 0 | hippocampus | 120 | 0.65 | 2015 |
| # 1 | physical activity | 114 | 0.59 | 2014 |
| # 2 | insulin resistance | 102 | 0.57 | 2015 |
| # 3 | major depressive disorder | 97 | 0.53 | 2015 |
| # 4 | postpartum depression | 92 | 0.51 | 2017 |
| # 5 | autobiographical memory | 29 | 0.86 | 2017 |
| # 6 | post-stroke depression | 12 | 0.93 | 2021 |

a If the Silhouette (S-value) ＞ 0.5, the cluster is reasonable; if S-value ＞ 0.7, the cluster is convincible

Table S3. Top 10 papers with the highest number of citations in the field of exercise for depression.

| Rank | Titles | First Author | Year | Citations | IF | Journal |
| --- | --- | --- | --- | --- | --- | --- |
| 1 | Depression, Anxiety and Stress during COVID-19: Associations with Changes in Physical Activity, Sleep, Tobacco and Alcohol Use in Australian Adults1 | [Stanton R](https://webofscience.clarivate.cn/wos/author/record/1975558) | 2020 | 819 | 4.61 | International Journal of Environmental Research and Public Health |
| 2 | Exercise as a treatment for depression: A meta-analysis adjusting for publication bias2 | [Schuch FB](https://webofscience.clarivate.cn/wos/author/record/1911010) | 2016 | 787 | 4.80 | [Journal of Psychiatric Research](https://www.sciencedirect.com/journal/journal-of-psychiatric-research) |
| 3 | Physical Activity and Incident Depression: A Meta-Analysis of Prospective Cohort Studies3 | Schuch FB | 2018 | 742 | 17.70 | American Journal of Psychiatry |
| 4 | Exercise for depression4 | Cooney GM | 2013 | 721 | 8.40 | Cochrane Database of Systematic Reviews |
| 5 | Physical Activity and the Prevention of Depression A Systematic Review of Prospective Studies5 | Mammen G | 2013 | 698 | 5.50 | American Journal of Preventive Medicine |
| 6 | A meta-meta-analysis of the effect of physical activity on depression and anxiety in non-clinical adult populations6 | Rebar AL | 2015 | 580 | 9.80 | Health Psychology Review |
| 7 | Sedentary behavior and physical activity levels in people with schizophrenia, bipolar disorder and major depressive disorder: a global systematic review and meta-analysis7 | Vancampfort D | 2017 | 512 | 73.30 | World Psychiatry |
| 8 | Exercise as a treatment for depression: A meta-analysis8 | Kvam S | 2016 | 474 | 6.60 | Journal of Affective Disorders |
| 9 | Exercise for the treatment of depression and anxiety9 | Carek PJ | 2011 | 435 | 2.00 | The International Journal of Psychiatry in Medicine |
| 10 | Physical activity and depression: Towards understanding the antidepressant mechanisms of physical activity10 | Kandola A | 2019 | 430 | 8.20 | Neuroscience & Biobehavioral Reviews |

IF: impact factor.

Supplementary Reference

1. Stanton R, To QG, Khalesi S, et al. Depression, Anxiety and Stress during COVID-19: Associations with Changes in Physical Activity, Sleep, Tobacco and Alcohol Use in Australian Adults. *Int J Environ Res Public Health*. 2020;17(11):4065. doi:10.3390/ijerph17114065

2. Schuch FB, Vancampfort D, Richards J, Rosenbaum S, Ward PB, Stubbs B. Exercise as a treatment for depression: A meta-analysis adjusting for publication bias. *J Psychiatr Res*. 2016;77:42-51. doi:10.1016/j.jpsychires.2016.02.023

3. Schuch FB, Vancampfort D, Firth J, et al. Physical Activity and Incident Depression: A Meta-Analysis of Prospective Cohort Studies. *Am J Psychiatry*. 2018;175(7):631-648. doi:10.1176/appi.ajp.2018.17111194

4. Cooney GM, Dwan K, Greig CA, et al. Exercise for depression. *Cochrane Database Syst Rev*. 2013;2013(9):CD004366. doi:10.1002/14651858.CD004366.pub6

5. Mammen G, Faulkner G. Physical activity and the prevention of depression: a systematic review of prospective studies. *Am J Prev Med*. 2013;45(5):649-657. doi:10.1016/j.amepre.2013.08.001

6. Rebar AL, Stanton R, Geard D, Short C, Duncan MJ, Vandelanotte C. A meta-meta-analysis of the effect of physical activity on depression and anxiety in non-clinical adult populations. *Health Psychol Rev*. 2015;9(3):366-378. doi:10.1080/17437199.2015.1022901

7. Vancampfort D, Firth J, Schuch FB, et al. Sedentary behavior and physical activity levels in people with schizophrenia, bipolar disorder and major depressive disorder: a global systematic review and meta-analysis. *World Psychiatry Off J World Psychiatr Assoc WPA*. 2017;16(3):308-315. doi:10.1002/wps.20458

8. Kvam S, Kleppe CL, Nordhus IH, Hovland A. Exercise as a treatment for depression: A meta-analysis. *J Affect Disord*. 2016;202:67-86. doi:10.1016/j.jad.2016.03.063

9. Carek PJ, Laibstain SE, Carek SM. Exercise for the treatment of depression and anxiety. *Int J Psychiatry Med*. 2011;41(1):15-28. doi:10.2190/PM.41.1.c

10. Kandola A, Ashdown-Franks G, Hendrikse J, Sabiston CM, Stubbs B. Physical activity and depression: Towards understanding the antidepressant mechanisms of physical activity. *Neurosci Biobehav Rev*. 2019;107:525-539. doi:10.1016/j.neubiorev.2019.09.040
